# Supplementary material
Source: publisher site journal article supplement (https://www.dovepress.com/article/450736)
Supplement: Supplementary file 1 [file get_supplementary_file.php]

**Supplementary materials**

**Manuscript ID number:**

450736

**Title of paper:**

Identification of shared signature genes and immune microenvironment subtypes for heart failure and chronic kidney disease based on machine learning

**Supplementary Figure:**





Supplementary Figure 1: Processing of single-cell data. (A) Single-cell fraction content. (B) Correlation of sequencing depth with gene identity and mitochondrial percentage. (C) Volcano plot showing highly variable genes in single-cell samples. (D) 0.3 is the optimal resolution for cell subpopulation delineation. (E) UMAP plots before and after de-batching.

**Supplementary Table:**

Supplementary Table 1: Top 20 important biological processes involved in crosstalk genes in HF and CKD.

| **Term** | ***P*-value** | **Genes** |
| --- | --- | --- |
| Positive Regulation of Immune System Process (GO:0002684) | 9.03E-04 | TGFB2;AQP3 |
| Fatty Acid Derivative Biosynthetic Process (GO:1901570) | 9.72E-04 | GGT5;HMGCS2 |
| Response to Steroid Hormone (GO:0048545) | 0.001042394 | TGFB2;ATP1A1 |
| Odontogenesis (GO:0042476) | 0.001882991 | TGFB2;AQP3 |
| Collagen Fibril Organization (GO:0030199) | 0.002181178 | TGFB2;TLL2 |
| Cell-Cell Adhesion via Plasma-membrane Adhesion Molecules (GO:0098742) | 0.002821251 | TGFB2;PCDHB5;PVR |
| Positive Regulation of Interleukin-8 Production (GO:0032757) | 0.004546192 | CHI3L1;CD14 |
| Inflammatory Response (GO:0006954) | 0.006817331 | GGT5;CHI3L1;CD14 |
| Regulation of Interleukin-8 Production (GO:0032677) | 0.007885320 | CHI3L1;CD14 |
| Activation of Protein Kinase Activity (GO:0032147) | 0.007885320 | TGFB2;CHI3L1 |
| Glomerular Epithelial Cell Differentiation (GO:0072311) | 0.008223548 | PROM1 |
| Positive Regulation of Natural Killer Cell Mediated Cytotoxicity Directed against Tumor Cell Target (GO:0002860) | 0.008223548 | PVR |
| Positive Regulation of Natural Killer Cell Mediated Immune Response to Tumor Cell (GO:0002857) | 0.008223548 | PVR |
| Ketone Body Biosynthetic Process (GO:0046951) | 0.008223548 | HMGCS2 |
| Purine Deoxyribonucleotide Catabolic Process (GO:0009155) | 0.008223548 | PNP |
| Purine Ribonucleoside Catabolic Process (GO:0046130) | 0.008223548 | PNP |
| Renal Filtration Cell Differentiation (GO:0061318) | 0.008223548 | PROM1 |
| Positive Regulation of Epithelial Cell Differentiation Involved in Kidney Development (GO:2000698) | 0.008223548 | PROM1 |
| Positive Regulation of Apoptotic Process (GO:0043065) | 0.009844833 | TGFB2;PHLDA1;IFIT2 |
| Negative Regulation of Membrane Protein Ectodomain Proteolysis (GO:0051045) | 0.009860378 | TIMP4 |
| Gland Morphogenesis (GO:0022612) | 0.009860378 | TGFB2 |
| Ketone Body Metabolic Process (GO:1902224) | 0.009860378 | HMGCS2 |
| Pharyngeal Arch Artery Morphogenesis (GO:0061626) | 0.009860378 | TGFB2 |
| Regulation of Transforming Growth Factor Beta2 Production (GO:0032909) | 0.009860378 | TGFB2 |
| Positive Regulation of Blood Circulation (GO:1903524) | 0.009860378 | TGFB2 |
| Regulation of Epithelial to Mesenchymal Transition Involved in Endocardial Cushion Formation (GO:1905005) | 0.011494589 | TGFB2 |
| Glutathione Catabolic Process (GO:0006751) | 0.011494589 | GGT5 |
| Ventricular Trabecula Myocardium Morphogenesis (GO:0003222) | 0.011494589 | TGFB2 |
| Regulation of Natural Killer Cell Mediated Cytotoxicity Directed against Tumor Cell Target (GO:0002858) | 0.011494589 | PVR |
| Purine Ribonucleoside Monophosphate Catabolic Process (GO:0009169) | 0.011494589 | PNP |
| Positive Regulation of Cardiac Epithelial to Mesenchymal Transition (GO:0062043) | 0.011494589 | TGFB2 |
| Regulation of Alpha-Beta T Cell Differentiation (GO:0046637) | 0.011494589 | PNP |
| Positive Regulation of Ligase Activity (GO:0051351) | 0.013126185 | MID1IP1 |
| Glucan Metabolic Process (GO:0044042) | 0.013126185 | PPP1R3C |
| Glucosamine-Containing Compound Catabolic Process (GO:1901072) | 0.013126185 | CHI3L1 |
| Regulation of Glucan Biosynthetic Process (GO:0010962) | 0.013126185 | PPP1R3C |
| Glycerol Transmembrane Transport (GO:0015793) | 0.013126185 | AQP3 |
| Regulation of Nephron Tubule Epithelial Cell Differentiation (GO:0072182) | 0.013126185 | PROM1 |
| Cardioblast Differentiation (GO:0010002) | 0.013126185 | TGFB2 |
| Response to Vitamin (GO:0033273) | 0.013126185 | AQP3 |
| Response to Vitamin D (GO:0033280) | 0.013126185 | AQP3 |
| Regulation of Cell Killing (GO:0031341) | 0.013126185 | TGFB2 |
| Regulation of Complement-dependent Cytotoxicity (GO:1903659) | 0.014755170 | TGFB2 |
| IMP Metabolic Process (GO:0046040) | 0.014755170 | PNP |
| Glucan Biosynthetic Process (GO:0009250) | 0.014755170 | PPP1R3C |
| Glycogen Biosynthetic Process (GO:0005978) | 0.014755170 | PPP1R3C |
| Leukotriene D4 Biosynthetic Process (GO:1901750) | 0.014755170 | GGT5 |
| Nucleobase-containing Compound Biosynthetic Process (GO:0034654) | 0.014755170 | PNP |
| Phosphatidylethanolamine Biosynthetic Process (GO:0006646) | 0.014755170 | ETNK2 |
| Positive Regulation of Cardiocyte Differentiation (GO:1905209) | 0.014755170 | TGFB2 |
| Supramolecular Fiber Organization (GO:0097435) | 0.015019414 | CNN1;TGFB2;TLL2 |
| Positive Regulation of Cytokine Production (GO:0001819) | 0.015529678 | PNP;CHI3L1;CD14 |
| Atrial Septum Morphogenesis (GO:0060413) | 0.016381548 | TGFB2 |
| Prostaglandin Transport (GO:0015732) | 0.016381548 | SLCO2A1 |
| Regulation of Biosynthetic Process (GO:0009889) | 0.016381548 | MID1IP1 |
| Embryonic Appendage Morphogenesis (GO:0035113) | 0.016381548 | TGFB2 |
| Regulation of Glycogen Metabolic Process (GO:0070873) | 0.018005323 | PPP1R3C |
| Leukotriene D4 Metabolic Process (GO:1901748) | 0.018005323 | GGT5 |
| Nucleoside Phosphate Biosynthetic Process (GO:1901293) | 0.018005323 | PNP |
| Catecholamine Biosynthetic Process (GO:0042423) | 0.018005323 | TGFB2 |
| Podocyte Differentiation (GO:0072112) | 0.018005323 | PROM1 |
| Response to Cytokine (GO:0034097) | 0.018030448 | CHI3L1;TIMP4 |
| Eye Photoreceptor Cell Differentiation (GO:0001754) | 0.019626498 | PROM1 |
| Regulation of Monooxygenase Activity (GO:0032768) | 0.019626498 | POR |
| Nucleotide Metabolic Process (GO:0009117) | 0.019626498 | PNP |
| Cardiac Right Ventricle Morphogenesis (GO:0003215) | 0.019626498 | TGFB2 |
| Sodium Ion Export Across Plasma Membrane (GO:0036376) | 0.019626498 | ATP1A1 |
| Regulation of Macrophage Cytokine Production (GO:0010935) | 0.021245079 | TGFB2 |
| Intracellular Potassium Ion Homeostasis (GO:0030007) | 0.021245079 | ATP1A1 |
| Atrial Septum Development (GO:0003283) | 0.021245079 | TGFB2 |
| Atrioventricular Valve Development (GO:0003171) | 0.021245079 | TGFB2 |
| Cardiocyte Differentiation (GO:0035051) | 0.021245079 | TGFB2 |
| Positive Regulation of Alpha-beta T Cell Differentiation (GO:0046638) | 0.021245079 | PNP |
| Response to Progesterone (GO:0032570) | 0.021245079 | TGFB2 |
| Secondary Palate Development (GO:0062009) | 0.021245079 | TGFB2 |
| Positive Regulation of Fatty Acid Biosynthetic Process (GO:0045723) | 0.021245079 | MID1IP1 |
| Sodium-independent Organic Anion Transport (GO:0043252) | 0.021245079 | SLCO2A1 |
| Icosanoid Transport (GO:0071715) | 0.022861069 | SLCO2A1 |
| Pathway-restricted SMAD Protein Phosphorylation (GO:0060389) | 0.022861069 | TGFB2 |
| Renal Water Homeostasis (GO:0003091) | 0.022861069 | AQP3 |
| Electron Transport Chain (GO:0022900) | 0.022861069 | POR |
| Activation of NF-kappaB-inducing Kinase Activity (GO:0007250) | 0.024474471 | CHI3L1 |
| Skeletal System Development (GO:0001501) | 0.025031327 | TGFB2;CHI3L1 |
| Negative Regulation of Phosphatase Activity (GO:0010923) | 0.026085291 | TGFB2 |
| acetyl-CoA Metabolic Process (GO:0006084) | 0.026085291 | HMGCS2 |
| Pharyngeal System Development (GO:0060037) | 0.026085291 | TGFB2 |
| Regulation of Transforming Growth Factor Beta Production (GO:0071634) | 0.026085291 | TGFB2 |
| Negative Regulation of Cytokine Production Involved in Immune Response (GO:0002719) | 0.026085291 | TGFB2 |
| Negative Regulation of Vascular Associated Smooth Muscle Cell Proliferation (GO:1904706) | 0.027693531 | CNN1 |
| Positive Regulation of Stem Cell Differentiation (GO:2000738) | 0.027693531 | TGFB2 |
| Purine-containing Compound Biosynthetic Process (GO:0072522) | 0.027693531 | PNP |
| Positive Regulation of Cell Adhesion Mediated by Integrin (GO:0033630) | 0.027693531 | TGFB2 |
| Embryo Development Ending in Birth or Egg Hatching (GO:0009792) | 0.027693531 | TGFB2 |
| Positive Regulation of Fatty Acid Metabolic Process (GO:0045923) | 0.027693531 | MID1IP1 |
| Regulation of Epidermal Cell Differentiation (GO:0045604) | 0.029299196 | AQP3 |
| Heart Trabecula Morphogenesis (GO:0061384) | 0.029299196 | TGFB2 |
| Positive Regulation of Stress-Activated Protein Kinase Signaling Cascade (GO:0070304) | 0.029299196 | TGFB2 |
| Intracellular Sodium Ion Homeostasis (GO:0006883) | 0.029299196 | ATP1A1 |
| Cardiac Atrium Morphogenesis (GO:0003209) | 0.029299196 | TGFB2 |
| Mesenchyme Morphogenesis (GO:0072132) | 0.029299196 | TGFB2 |
| Pulmonary Valve Morphogenesis (GO:0003184) | 0.029299196 | TGFB2 |
| Energy Reserve Metabolic Process (GO:0006112) | 0.029299196 | PPP1R3C |
| Fluid Transport (GO:0042044) | 0.030902290 | AQP3 |
| Glycogen Metabolic Process (GO:0005977) | 0.030902290 | PPP1R3C |
| Water Transport (GO:0006833) | 0.030902290 | AQP3 |
| Atrioventricular Valve Morphogenesis (GO:0003181) | 0.030902290 | TGFB2 |
| Leukotriene Biosynthetic Process (GO:0019370) | 0.030902290 | GGT5 |
| Nucleotide Biosynthetic Process (GO:0009165) | 0.030902290 | PNP |
| Cardiac Epithelial to Mesenchymal Transition (GO:0060317) | 0.030902290 | TGFB2 |
| Multicellular Organismal-level Water Homeostasis (GO:0050891) | 0.030902290 | AQP3 |
| Positive Regulation of Alpha-beta T Cell Activation (GO:0046635) | 0.030902290 | PNP |
| Dopamine Metabolic Process (GO:0042417) | 0.030902290 | TGFB2 |
| Embryonic Digestive Tract Development (GO:0048566) | 0.030902290 | TGFB2 |
| Negative Regulation of Microtubule Depolymerization (GO:0007026) | 0.032502816 | MID1IP1 |
| Negative Regulation of Small GTPase Mediated Signal Transduction (GO:0051058) | 0.032502816 | TGFB2 |
| Limb Morphogenesis (GO:0035108) | 0.032502816 | TGFB2 |
| Regulation of Smooth Muscle Contraction (GO:0006940) | 0.032502816 | CNN1 |
| Pulmonary Valve Development (GO:0003177) | 0.032502816 | TGFB2 |
| Response to Ketone (GO:1901654) | 0.032502816 | TGFB2 |
| Extracellular Matrix Organization (GO:0030198) | 0.034013257 | TGFB2;TLL2 |
| Positive Regulation of Heart Contraction (GO:0045823) | 0.034100780 | TGFB2 |
| Positive Regulation of Natural Killer Cell Mediated Cytotoxicity (GO:0045954) | 0.034100780 | PVR |
| Regulation of Membrane Protein Ectodomain Proteolysis (GO:0051043) | 0.034100780 | TIMP4 |
| Endocardial Cushion Morphogenesis (GO:0003203) | 0.034100780 | TGFB2 |
| Positive Regulation of Neuron Apoptotic Process (GO:0043525) | 0.037289032 | TGFB2 |
| Positive Regulation of Oxidoreductase Activity (GO:0051353) | 0.037289032 | POR |
| Negative Regulation of Protein Depolymerization (GO:1901880) | 0.037289032 | MID1IP1 |
| Potassium Ion Homeostasis (GO:0055075) | 0.037289032 | ATP1A1 |
| Regulation of Toll-Like Receptor 4 Signaling Pathway (GO:0034143) | 0.037289032 | CD14 |
| Endocardial Cushion Development (GO:0003197) | 0.037289032 | TGFB2 |
| Gliogenesis (GO:0042063) | 0.038879330 | TGFB2 |
| Positive Regulation of Natural Killer Cell Mediated Immunity (GO:0002717) | 0.038879330 | PVR |
| Positive Regulation of Peptidyl-threonine Phosphorylation (GO:0010800) | 0.038879330 | CHI3L1 |
| Regulation of Microtubule Depolymerization (GO:0031114) | 0.038879330 | MID1IP1 |
| Outflow Tract Septum Morphogenesis (GO:0003148) | 0.038879330 | TGFB2 |
| Transcription By RNA Polymerase II (GO:0006366) | 0.039844912 | CEBPD;HLTF |
| Positive Regulation of Interleukin-2 Production (GO:0032743) | 0.040467080 | PNP |
| Regulation of Glycogen Biosynthetic Process (GO:0005979) | 0.040467080 | PPP1R3C |
| Phosphatidylethanolamine Metabolic Process (GO:0046337) | 0.040467080 | ETNK2 |
| Purine Ribonucleotide Catabolic Process (GO:0009154) | 0.040467080 | PNP |
| Cellular Response to Steroid Hormone Stimulus (GO:0071383) | 0.040467080 | ATP1A1 |
| Sodium Ion Homeostasis (GO:0055078) | 0.040467080 | ATP1A1 |
| Negative Regulation of Insulin Receptor Signaling Pathway (GO:0046627) | 0.042052286 | GRB14 |
| Regulation of Fatty Acid Biosynthetic Process (GO:0042304) | 0.042052286 | MID1IP1 |
| Positive Regulation of Monooxygenase Activity (GO:0032770) | 0.042052286 | POR |
| Regulation of Keratinocyte Differentiation (GO:0045616) | 0.042052286 | AQP3 |
| Organic Substance Transport (GO:0071702) | 0.043281129 | SLCO2A1;AQP3 |
| Ventricular Septum Morphogenesis (GO:0060412) | 0.043634953 | TGFB2 |
| Respiratory Tube Development (GO:0030323) | 0.043634953 | CHI3L1 |
| Dorsal/Ventral Pattern Formation (GO:0009953) | 0.043634953 | TLL2 |
| Negative Regulation of Cellular Response to Insulin Stimulus (GO:1900077) | 0.043634953 | GRB14 |
| Regulation of Angiogenesis (GO:0045765) | 0.044843054 | TGFB2;CHI3L1 |
| Regulation of Lipid Biosynthetic Process (GO:0046890) | 0.045215085 | MID1IP1 |
| Primary Neural Tube Formation (GO:0014020) | 0.045215085 | TGFB2 |
| Tube Closure (GO:0060606) | 0.046792684 | TGFB2 |
| Integrated Stress Response Signaling (GO:0140467) | 0.046792684 | CEBPD |
| Regulation of Muscle Contraction (GO:0006937) | 0.046792684 | CNN1 |
| Cardiac Muscle Cell Action Potential (GO:0086001) | 0.046792684 | ATP1A1 |
| Artery Morphogenesis (GO:0048844) | 0.048367756 | TGFB2 |
| Cardiac Muscle Cell Action Potential Involved in Contraction (GO:0086002) | 0.048367756 | ATP1A1 |
| Negative Regulation of Microtubule Polymerization or Depolymerization (GO:0031111) | 0.049940305 | MID1IP1 |
| acyl-CoA Metabolic Process (GO:0006637) | 0.049940305 | HMGCS2 |

Supplementary Table 2: Results of crosstalk gene enrichment analysis based on Hallmark gene sets.

| **Term** | ***P*-value** | **Genes** |
| --- | --- | --- |
| TNF-alpha Signaling via NF-kB | 0.004309454 | CEBPD;PHLDA1;IFIT2 |
| Interferon Gamma Response | 0.004309454 | SAMD9L;PNP;IFIT2 |
| Interferon Alpha Response | 0.011147090 | SAMD9L;IFIT2 |
| Apoptosis | 0.028884962 | TGFB2;CD14 |
| IL-2/STAT5 Signaling | 0.042508106 | PNP;PHLDA1 |
| Myogenesis | 0.042893952 | PPP1R3C;ANKRD2 |
| Inflammatory Response | 0.042893952 | CD14;PVR |
| Xenobiotic Metabolism | 0.042893952 | TGFB2;POR |
| Angiogenesis | 0.057765325 | SLCO2A1 |
| IL-6/JAK/STAT3 Signaling | 0.134093356 | CD14 |
| Protein Secretion | 0.146925511 | ATP1A1 |
| Coagulation | 0.204410779 | HMGCS2 |
| DNA Repair | 0.220133038 | PNP |
| Fatty Acid Metabolism | 0.230446714 | HMGCS2 |
| UV Response Up | 0.230446714 | AQP3 |
| Mitotic Spindle | 0.281262715 | MID1IP1 |
| Hypoxia | 0.282460549 | PPP1R3C |
| Adipogenesis | 0.282460549 | POR |
| Estrogen Response Early | 0.282460549 | AQP3 |
| Estrogen Response Late | 0.282460549 | HMGCS2 |
| mTORC1 Signaling | 0.282460549 | PNP |
| Epithelial Mesenchymal Transition | 0.282460549 | PVR |
| Oxidative Phosphorylation | 0.282460549 | POR |
| heme Metabolism | 0.282460549 | AQP3 |
| Allograft Rejection | 0.282460549 | TGFB2 |
| KRAS Signaling Dn | 0.282460549 | TGFB2 |

Supplementary Table 3: Immunological infiltration scores of CKD samples and subgroups.

| CKD sample | ImmuneScore | | Group | |
| --- | --- | --- | --- | --- |
| GSM1623299 | | 0.829912839 | | high | |
| GSM1623300 | | 0.915754002 | | high | |
| GSM1623301 | | 0.402897881 | | low | |
| GSM1623302 | | 0.627037954 | | high | |
| GSM1623303 | | 1.000000000 | | high | |
| GSM1623304 | | 0.336095640 | | low | |
| GSM1623305 | | 0.672889887 | | high | |
| GSM1623306 | | 0.559173342 | | low | |
| GSM1623307 | | 0.464243206 | | low | |
| GSM1623308 | | 0.533831317 | | low | |
| GSM1623309 | | 0.298825791 | | low | |
| GSM1623310 | | 0.979608442 | | high | |
| GSM1623311 | | 0.141731458 | | low | |
| GSM1623312 | | 0.161760420 | | low | |
| GSM1623313 | | 0.233692716 | | low | |
| GSM1623314 | | 0.932911545 | | high | |
| GSM1623315 | | 0.233692716 | | low | |
| GSM1623316 | | 0.298825791 | | low | |
| GSM1623317 | | 0.717630693 | | high | |
| GSM1623318 | | 0.909047033 | | high | |
| GSM1623319 | | 0.307675697 | | low | |
| GSM1623320 | | 0.196369616 | | low | |
| GSM1623321 | | 0.532332084 | | low | |
| GSM1623322 | | 0 | | low | |
| GSM1623323 | | 0.368721080 | | low | |
| GSM1623324 | | 0.028339254 | | low | |
| GSM1623325 | | 0.767175697 | | high | |
| GSM1623326 | | 0.772770078 | | high | |
| GSM1623327 | | 0.633362616 | | high | |
| GSM1623328 | | 0.412632514 | | low | |
| GSM1623329 | | 0.840181401 | | high | |
| GSM1623330 | | 0.154926249 | | low | |
| GSM1623331 | | 0.644240699 | | high | |
| GSM1623332 | | 0.780940900 | | high | |
| GSM1623333 | | 0.464243206 | | low | |
| GSM1623334 | | 0.512712792 | | low | |
| GSM1623335 | | 0.401700174 | | low | |
| GSM1623336 | | 0.605116543 | | high | |
| GSM1623337 | | 0.772770078 | | high | |
| GSM1623338 | | 0.601729107 | | high | |
| GSM1623339 | | 0.628548005 | | high | |
| GSM1623340 | | 0.688089029 | | high | |
| GSM1623341 | | 0.464243206 | | low | |
| GSM1623342 | | 0.479298154 | | low | |
| GSM1623343 | | 0.840181401 | | high | |
| GSM1623344 | | 0.890776374 | | high | |
| GSM1623345 | | 0.688089029 | | high | |
| GSM1623346 | | 0.782489905 | | high | |
| GSM1623352 | | 0.791393696 | | high | |
| GSM1623353 | | 0.735892561 | | high | |
| GSM1623354 | | 0.782489905 | | high | |
| GSM1623355 | | 0.791393696 | | high | |
| GSM1623356 | | 0.190301505 | | low | |

Supplementary Table 4: Immunological infiltration scores of HF samples and subgroups.

| HF samples | ImmuneScore | Group |
| --- | --- | --- |
| GSM1379993 | 0 | low |
| GSM1380051 | 0 | low |
| GSM1379928 | 0.058748020 | low |
| GSM1380018 | 0.110241934 | low |
| GSM1379938 | 0.143728015 | low |
| GSM1380039 | 0.143728015 | low |
| GSM1380058 | 0.143728015 | low |
| GSM1380061 | 0.143728015 | low |
| GSM1380081 | 0.143728015 | low |
| GSM1380117 | 0.143728015 | low |
| GSM1380041 | 0.150029827 | low |
| GSM1380093 | 0.150029827 | low |
| GSM1379812 | 0.205216979 | low |
| GSM1379813 | 0.205216979 | low |
| GSM1379817 | 0.205216979 | low |
| GSM1379819 | 0.205216979 | low |
| GSM1379824 | 0.205216979 | low |
| GSM1379827 | 0.205216979 | low |
| GSM1379828 | 0.205216979 | low |
| GSM1379929 | 0.205216979 | low |
| GSM1379930 | 0.205216979 | low |
| GSM1379934 | 0.205216979 | low |
| GSM1379935 | 0.205216979 | low |
| GSM1379936 | 0.205216979 | low |
| GSM1379937 | 0.205216979 | low |
| GSM1379940 | 0.205216979 | low |
| GSM1379946 | 0.205216979 | low |
| GSM1379947 | 0.205216979 | low |
| GSM1379948 | 0.205216979 | low |
| GSM1379950 | 0.205216979 | low |
| GSM1379957 | 0.205216979 | low |
| GSM1379992 | 0.205216979 | low |
| GSM1379994 | 0.205216979 | low |
| GSM1380000 | 0.205216979 | low |
| GSM1380002 | 0.205216979 | low |
| GSM1380004 | 0.205216979 | low |
| GSM1380006 | 0.205216979 | low |
| GSM1380017 | 0.205216979 | low |
| GSM1380023 | 0.205216979 | low |
| GSM1380029 | 0.205216979 | low |
| GSM1380030 | 0.205216979 | low |
| GSM1380048 | 0.205216979 | low |
| GSM1380050 | 0.205216979 | low |
| GSM1380052 | 0.205216979 | low |
| GSM1380064 | 0.205216979 | low |
| GSM1380065 | 0.205216979 | low |
| GSM1380078 | 0.205216979 | low |
| GSM1380079 | 0.205216979 | low |
| GSM1380082 | 0.205216979 | low |
| GSM1380100 | 0.205216979 | low |
| GSM1380101 | 0.205216979 | low |
| GSM1380120 | 0.205216979 | low |
| GSM1379952 | 0.293520904 | low |
| GSM1380069 | 0.303714033 | low |
| GSM1379816 | 0.348479776 | low |
| GSM1379820 | 0.348479776 | low |
| GSM1379822 | 0.348479776 | low |
| GSM1379823 | 0.348479776 | low |
| GSM1379826 | 0.348479776 | low |
| GSM1379829 | 0.348479776 | low |
| GSM1379931 | 0.348479776 | low |
| GSM1379942 | 0.348479776 | low |
| GSM1379944 | 0.348479776 | low |
| GSM1379945 | 0.348479776 | low |
| GSM1379949 | 0.348479776 | low |
| GSM1379951 | 0.348479776 | low |
| GSM1379953 | 0.348479776 | low |
| GSM1379958 | 0.348479776 | low |
| GSM1379964 | 0.348479776 | low |
| GSM1379995 | 0.348479776 | low |
| GSM1379997 | 0.348479776 | low |
| GSM1379998 | 0.348479776 | low |
| GSM1380001 | 0.348479776 | low |
| GSM1380007 | 0.348479776 | low |
| GSM1380019 | 0.348479776 | low |
| GSM1380020 | 0.348479776 | low |
| GSM1380022 | 0.348479776 | low |
| GSM1380024 | 0.348479776 | low |
| GSM1380025 | 0.348479776 | low |
| GSM1380028 | 0.348479776 | low |
| GSM1380031 | 0.348479776 | low |
| GSM1380033 | 0.348479776 | low |
| GSM1380034 | 0.348479776 | low |
| GSM1380036 | 0.348479776 | low |
| GSM1380037 | 0.348479776 | low |
| GSM1380038 | 0.348479776 | low |
| GSM1380042 | 0.348479776 | low |
| GSM1380045 | 0.348479776 | low |
| GSM1380046 | 0.348479776 | low |
| GSM1380054 | 0.348479776 | low |
| GSM1380070 | 0.348479776 | low |
| GSM1380071 | 0.348479776 | low |
| GSM1380075 | 0.348479776 | low |
| GSM1380077 | 0.348479776 | low |
| GSM1380083 | 0.348479776 | low |
| GSM1380084 | 0.348479776 | low |
| GSM1380092 | 0.348479776 | low |
| GSM1380096 | 0.348479776 | low |
| GSM1380097 | 0.348479776 | low |
| GSM1380098 | 0.348479776 | low |
| GSM1380099 | 0.348479776 | low |
| GSM1380102 | 0.348479776 | low |
| GSM1380103 | 0.348479776 | low |
| GSM1380104 | 0.348479776 | low |
| GSM1380107 | 0.348479776 | low |
| GSM1380108 | 0.348479776 | low |
| GSM1380113 | 0.348479776 | low |
| GSM1380115 | 0.348479776 | low |
| GSM1380119 | 0.348479776 | low |
| GSM1380121 | 0.348479776 | low |
| GSM1379814 | 0.354829888 | low |
| GSM1379825 | 0.354829888 | low |
| GSM1379933 | 0.354829888 | low |
| GSM1379943 | 0.354829888 | low |
| GSM1379996 | 0.354829888 | low |
| GSM1380003 | 0.354829888 | low |
| GSM1380005 | 0.354829888 | low |
| GSM1380043 | 0.354829888 | low |
| GSM1380053 | 0.354829888 | low |
| GSM1380059 | 0.354829888 | low |
| GSM1380085 | 0.354829888 | low |
| GSM1380094 | 0.354829888 | low |
| GSM1380105 | 0.354829888 | low |
| GSM1379815 | 0.446958392 | high |
| GSM1379959 | 0.446958392 | high |
| GSM1380056 | 0.488864112 | high |
| GSM1380089 | 0.488864112 | high |
| GSM1380116 | 0.488864112 | high |
| GSM1379818 | 0.497852107 | high |
| GSM1379917 | 0.497852107 | high |
| GSM1379932 | 0.497852107 | high |
| GSM1379939 | 0.497852107 | high |
| GSM1379954 | 0.497852107 | high |
| GSM1379956 | 0.497852107 | high |
| GSM1379960 | 0.497852107 | high |
| GSM1379999 | 0.497852107 | high |
| GSM1380009 | 0.497852107 | high |
| GSM1380035 | 0.497852107 | high |
| GSM1380040 | 0.497852107 | high |
| GSM1380057 | 0.497852107 | high |
| GSM1380060 | 0.497852107 | high |
| GSM1380063 | 0.497852107 | high |
| GSM1380086 | 0.497852107 | high |
| GSM1380090 | 0.497852107 | high |
| GSM1380109 | 0.497852107 | high |
| GSM1380110 | 0.497852107 | high |
| GSM1380111 | 0.497852107 | high |
| GSM1380112 | 0.497852107 | high |
| GSM1380114 | 0.497852107 | high |
| GSM1380118 | 0.497852107 | high |
| GSM1379941 | 0.508123299 | high |
| GSM1380032 | 0.508123299 | high |
| GSM1380055 | 0.508123299 | high |
| GSM1380066 | 0.508123299 | high |
| GSM1380080 | 0.508123299 | high |
| GSM1380087 | 0.508123299 | high |
| GSM1380088 | 0.508123299 | high |
| GSM1379955 | 0.650894994 | high |
| GSM1380026 | 0.650894994 | high |
| GSM1380049 | 0.650894994 | high |
| GSM1380062 | 0.650894994 | high |
| GSM1380067 | 0.650894994 | high |
| GSM1380073 | 0.650894994 | high |
| GSM1380091 | 0.650894994 | high |
| GSM1379916 | 0.665856147 | high |
| GSM1379963 | 0.665856147 | high |
| GSM1380047 | 0.665856147 | high |
| GSM1380068 | 0.783514716 | high |
| GSM1380072 | 0.790787334 | high |
| GSM1379821 | 0.808363553 | high |
| GSM1380044 | 0.808363553 | high |
| GSM1380074 | 0.808363553 | high |
| GSM1380106 | 0.808363553 | high |
| GSM1380016 | 0.829176485 | high |
| GSM1380076 | 0.829176485 | high |
| GSM1380095 | 0.829176485 | high |
| GSM1379879 | 1.000000000 | high |
